# Supplementary material for: Porphin-Based Carbon Dots for “Turn Off–On” Phosphate Sensing and Cell Imaging
Source: MDPI journal article supplement (doi:10.3390/nano10020326), 2020-02-14
Supplement: s1 [file s1]

## Supporting Information

# Porphin-based Carbon Dots for “Turn Off–On” Phosphate Sensing and Cell Imaging

Jing Wu <sup>†</sup>, Wenjing Wang <sup>†</sup> and Zonghua Wang <sup>\*</sup>

College of Chemistry and Chemical Engineering, Shandong Sino-Japanese Center for Collaborative Research of Carbon Nanomaterials, Qingdao University, Qingdao 266071, China

<sup>\*</sup> Correspondence: wangzonghua@qdu.edu.cn; Tel.: +86-532-85950873

<sup>†</sup> These authors contributed equally to this work.

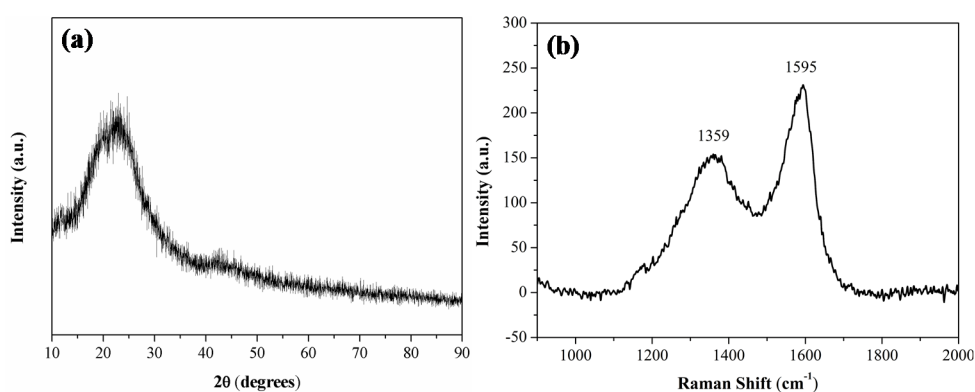

Figure S1. The XRD (a) and Raman spectra (b) of PCDs.

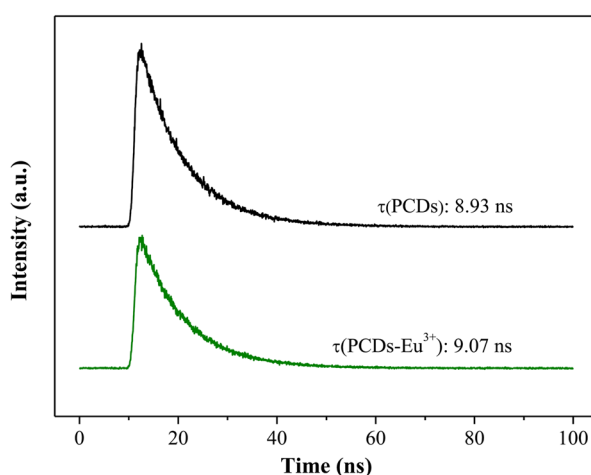

Figure S2. The photoluminescent decay profiles and lifetimes of PCDs and PCDs-Eu<sup>3+</sup>.

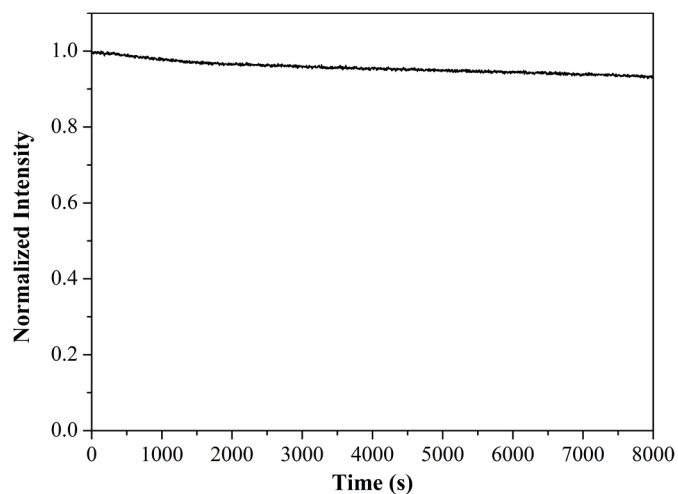

**Figure S3.** The variation of fluorescence intensity for PCDs with irradiation time ( $\lambda_{\text{ex}}/\lambda_{\text{em}} = 375/645 \text{ nm}$ ).

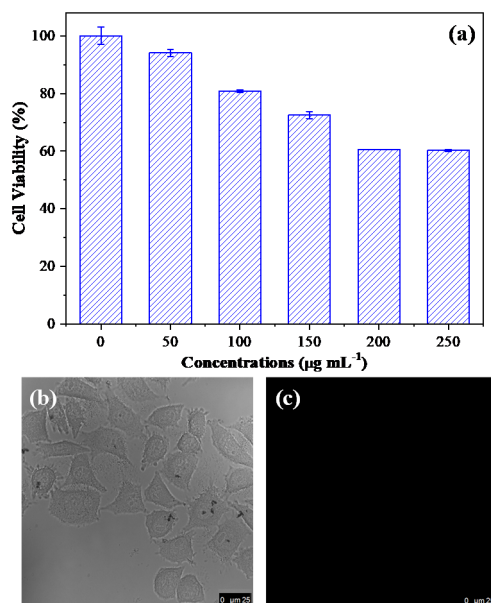

**Figure S4.** Cell viability of HeLa cells at different concentrations of PCDs (0, 50, 100, 150, 200, 250  $\mu\text{g mL}^{-1}$ ) (a); Confocal fluorescence microscopy images of HeLa cells without labeling under bright field (b) and the excitation wavelength of 552 nm (c).

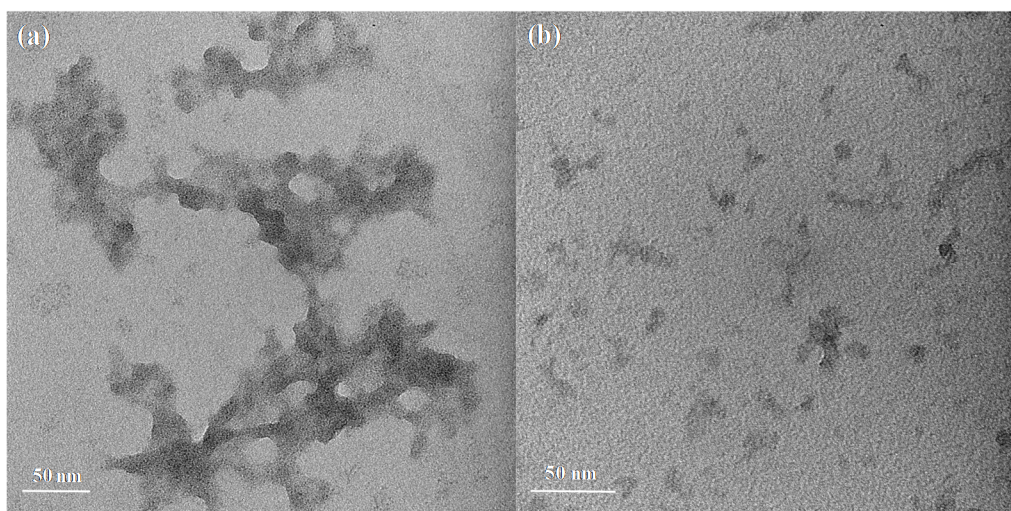

**Figure S5.** TEM images of PCDs-Eu<sup>3+</sup> (a) and PCDs-Eu<sup>3+</sup>-PO<sub>4</sub><sup>3-</sup> (b).

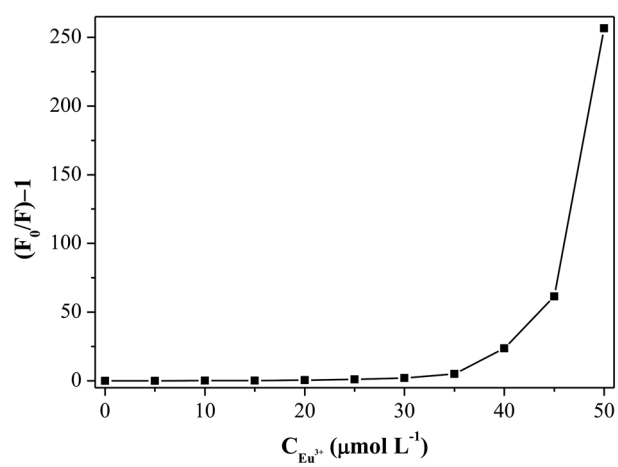

**Figure S6.** The relationship between  $F_0/F - 1$  and the concentration of Eu<sup>3+</sup>.

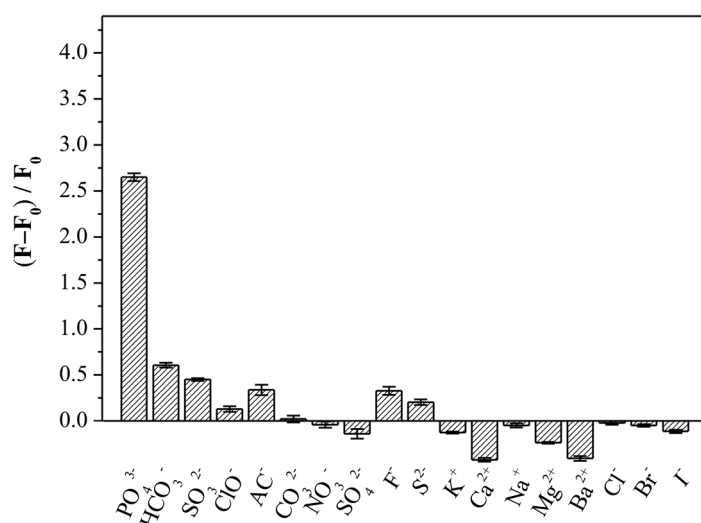

**Figure S7.** Fluorescence variations of PCDs-Eu<sup>3+</sup> to different kinds of anions and cations. Concentrations: PO<sub>4</sub><sup>3-</sup>: 0.05 mmol L<sup>-1</sup>; F<sup>-</sup>: 0.5 mmol L<sup>-1</sup>; HCO<sub>3</sub><sup>-</sup>, SO<sub>3</sub><sup>2-</sup>, ClO<sup>-</sup>, CH<sub>3</sub>COO<sup>-</sup> (AC<sup>-</sup>), CO<sub>3</sub><sup>2-</sup>, NO<sub>3</sub><sup>-</sup>, SO<sub>4</sub><sup>2-</sup>, S<sup>2-</sup>, K<sup>+</sup> Ca<sup>2+</sup>, Na<sup>+</sup>, Mg<sup>2+</sup>, Ba<sup>2+</sup>, Cl<sup>-</sup>, Br<sup>-</sup>, I<sup>-</sup>: 5.0 mmol L<sup>-1</sup>. All data are collected at λ<sub>ex</sub> 375.0 nm. PCDs, 0.02 mg mL<sup>-1</sup>; Eu<sup>3+</sup>, 30.0 μmol L<sup>-1</sup>; Tris-HCl buffer, pH 7.8.

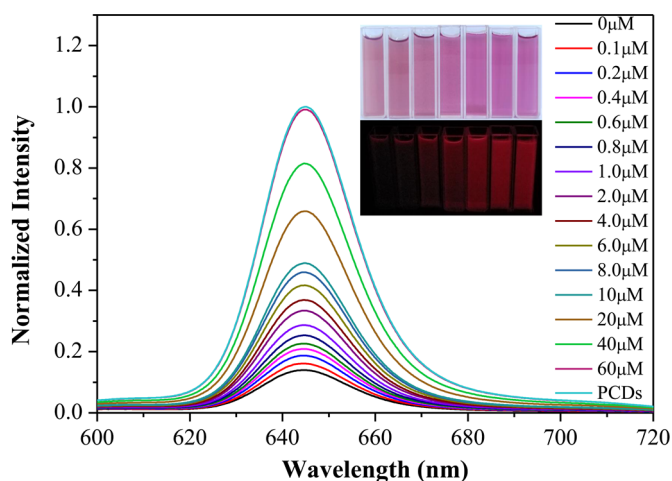

**Figure S8.** The emission spectra of PCDs-Eu<sup>3+</sup> upon the addition of various amounts of phosphate (0.1–60.0 μmol L<sup>-1</sup>); Inset: the photographs of PCDs-Eu<sup>3+</sup> in the presence of 0, 4, 10, 20, 40, 60 μmol L<sup>-1</sup> phosphate and the original PCDs (from left to right) under the illumination of daylight and UV light.

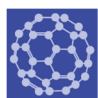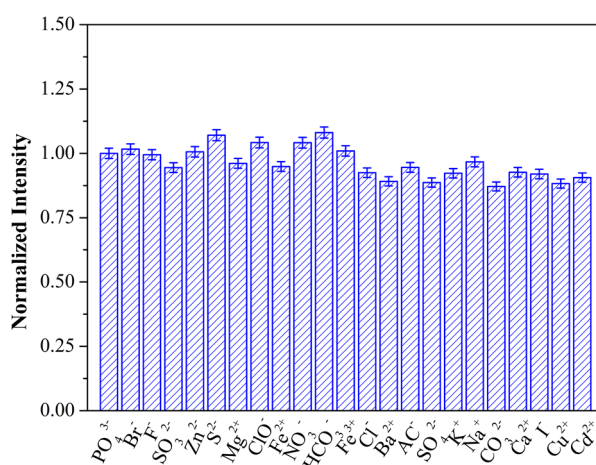

**Figure S9.** Fluorescence response of PCDs-Eu<sup>3+</sup>-PO<sub>4</sub><sup>3-</sup> under the co-existing of other ions (PO<sub>4</sub><sup>3-</sup>, 50 μmol L<sup>-1</sup>; Br<sup>-</sup>, SO<sub>3</sub><sup>2-</sup>, S<sup>2-</sup>, ClO<sup>-</sup>, NO<sub>3</sub><sup>-</sup>, HCO<sub>3</sub><sup>-</sup>, Cl<sup>-</sup>, AC<sup>-</sup>, SO<sub>4</sub><sup>2-</sup>, K<sup>+</sup>, Na<sup>+</sup>, CO<sub>3</sub><sup>2-</sup>, I<sup>-</sup>, 5000 μmol L<sup>-1</sup>; F<sup>-</sup>, Zn<sup>2+</sup>, Mg<sup>2+</sup>, Fe<sup>2+</sup>, Fe<sup>3+</sup>, Ba<sup>2+</sup>, Ca<sup>2+</sup>, Cu<sup>2+</sup>, Cd<sup>2+</sup>, 300 μmol L<sup>-1</sup>.) All data are collected at λ<sub>ex</sub>/λ<sub>em</sub> = 375/645 nm. PCDs, 0.02 mg mL<sup>-1</sup>; Eu<sup>3+</sup>, 30.0 μmol L<sup>-1</sup>; Tris-HCl buffer, pH 7.8.
